# Psychiatric Services

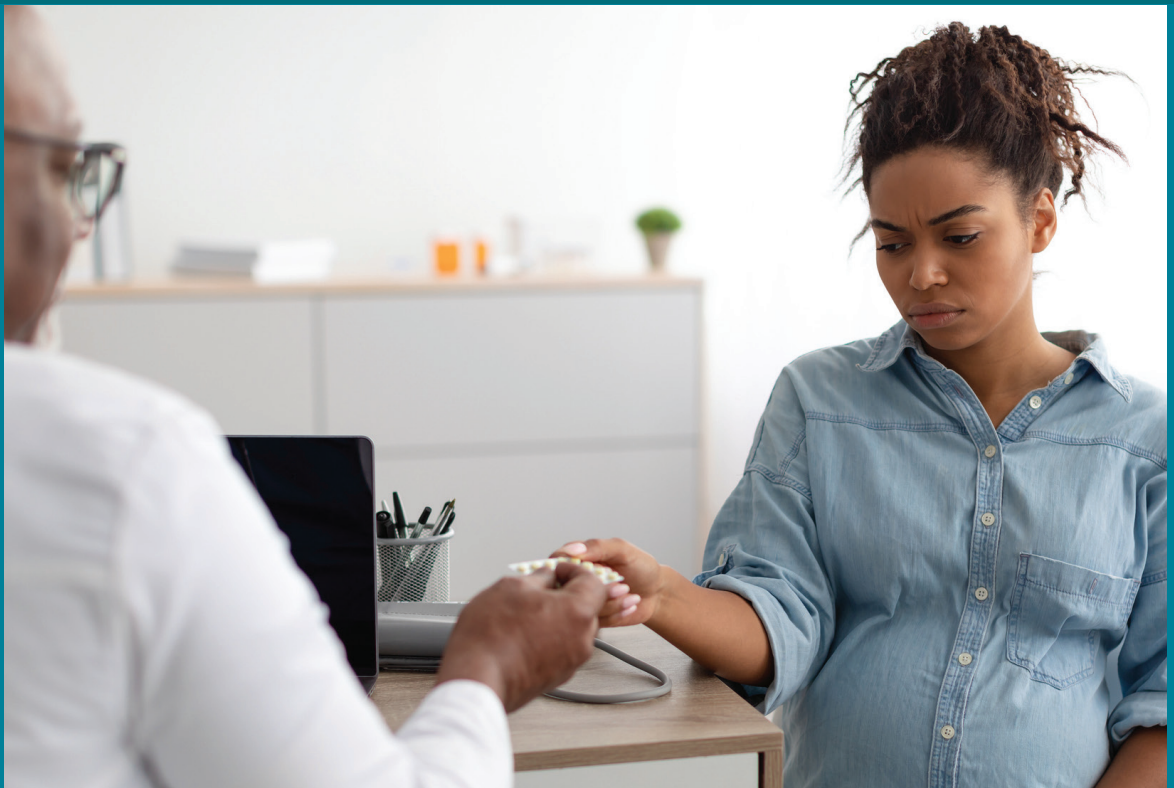

A call to action for intensive U.S. perinatal mental health programs  
Psychiatrists' decision making about telemedicine versus in-person care  
Youths' experiences of police involvement at involuntary psychiatric hold  
Personal Account: Bipolar disorder: a springboard to my higher self
